# Supplementary material
Source: publisher figshare collection journal article supplement (https://acs.figshare.com/ndownloader/files/3783505)
Supplement: Supplementary file 1 [file 3783505]

## Supporting information

### **Surface functionalized porous lignin for fast and efficient lead removal from aqueous solution**

Zhili Li <sup>1,2</sup>, Duo Xiao <sup>1</sup>, Yuanyuan Ge <sup>1\*</sup>, Stephan Koehler <sup>2</sup>

<sup>1</sup>*School of Chemistry and Chemical Engineering, Guangxi University, Nanning, 530004, China*

<sup>2</sup>*School of Engineering and Applied Sciences, Harvard University, Cambridge, MA, 02138, USA*

---

\* Corresponding author: School of Chemistry and Chemical Engineering, Guangxi University, Nanning, 530004, China geyy@gxu.edu.cn (Y. Ge).

# 1. Results and discussion

## 1.1 Synthesis and characterization of SFPL

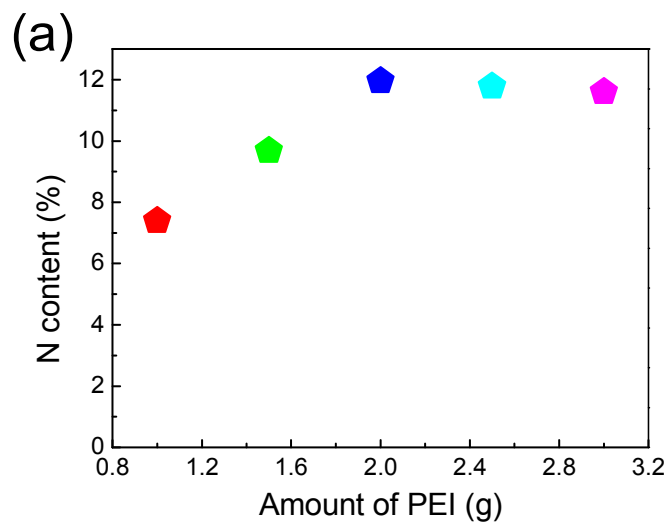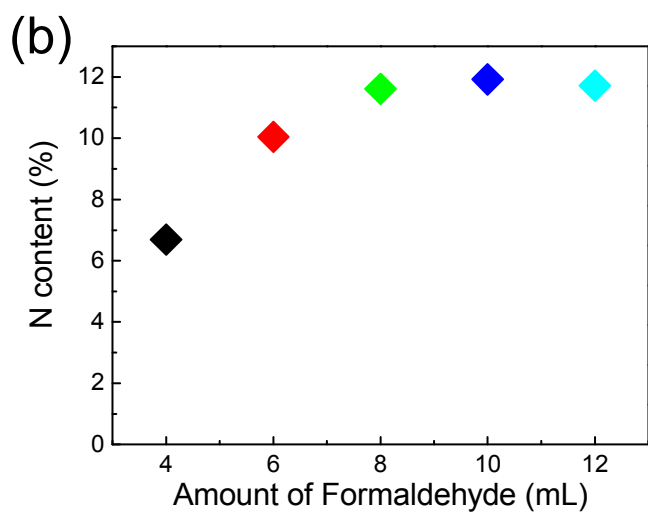

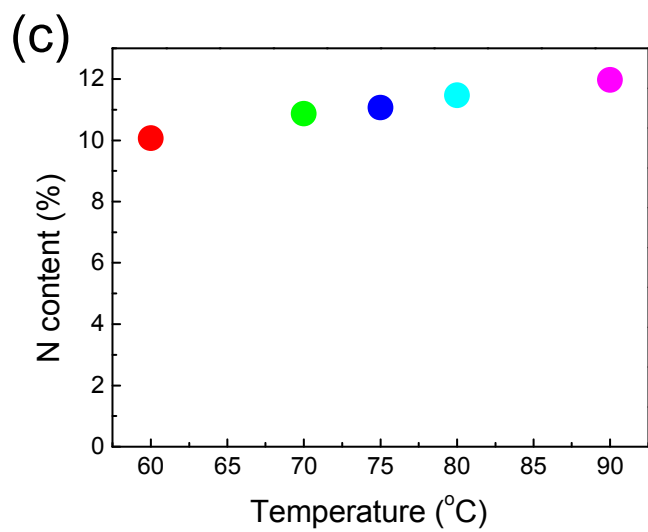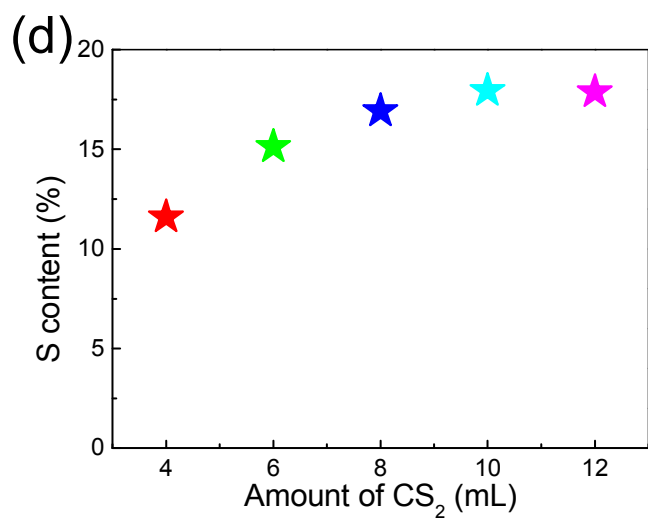

**Fig. S1.** Influences of synthetic conditions of (a) the amount of PEI, (b) the amount of formaldehyde, (c) reaction temperature on the N content of SFPL, and (d) the amount of CS<sub>2</sub> on the S content of SFPL.

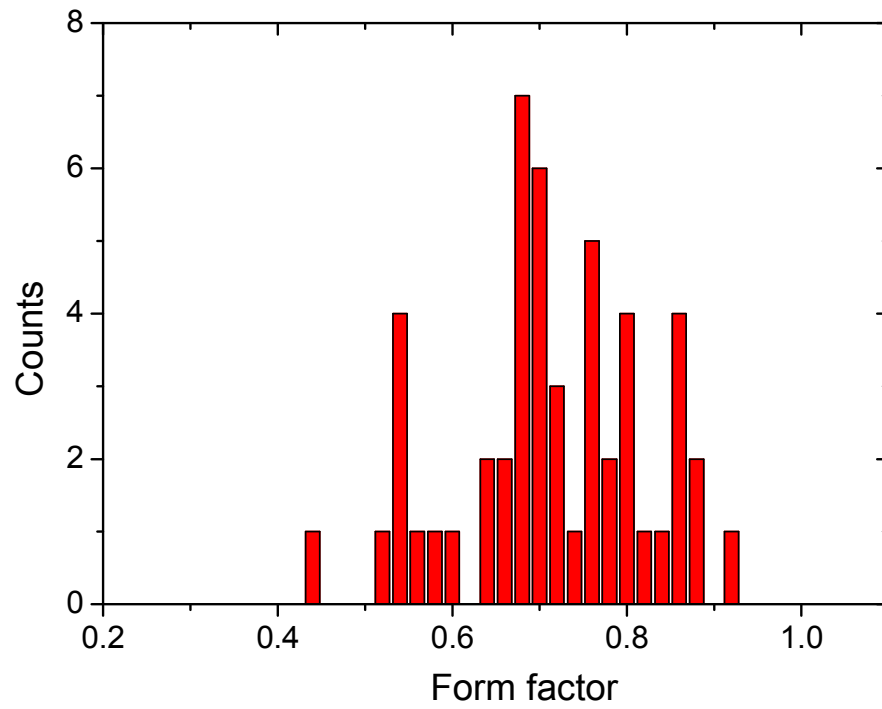

**Fig. S2.** Form factor distribution of the pores of SFPL determined by ImageJ 1.48v from 50 pores in the SEM image.
